# Supplementary material for: Defective Cd0.3Zn0.7S twin crystal/Ag3PO4 Z-scheme heterojunctions toward optimized visible-light-driven photocatalytic hydrogen evolution
Source: Royal Society of Chemistry journal article supplement (doi:10.1039/d3dt00943b), 2023-01-01
Supplement: d3dt00943b1.pdf [file d3dt00943b1.pdf]

ARTICLE

**Defective  $\text{Cd}_{0.3}\text{Zn}_{0.7}\text{S}$  Twin Crystal/ $\text{Ag}_3\text{PO}_4$  Z-Scheme  
Heterojunctions Toward Optimized Visible-Light-Driven  
Photocatalytic Hydrogen Evolution**

Received 00th January 20xx,  
Accepted 00th January 20xx

DOI: 10.1039/x0xx00000x

Jie Chen<sup>a</sup>, Haitao Yu<sup>a,\*</sup>, Ying Xie<sup>a,\*</sup>, Zhenzi Li<sup>b</sup>, Wei Zhou<sup>b,\*</sup>

## Experimental section

### Material preparation

The chemical reagents used were cadmium acetate dihydrate ( $\text{Cd}(\text{CH}_3\text{COO})_2 \cdot 2\text{H}_2\text{O}$ , Bide Pharmaceuticals), zinc acetate dihydrate ( $\text{Zn}(\text{CH}_3\text{COO})_2 \cdot 2\text{H}_2\text{O}$ , Guangfu Group), thioacetamide ( $\text{C}_2\text{H}_5\text{NS}$  Aladdin Reagent Co.), and ethylenediamine, silver nitrate ( $\text{AgNO}_3$  Aladdin Reagent Co.), Sodium phosphate tribasic ( $\text{Na}_3\text{PO}_4$  Kaitong Chemical Reagent Co.), and they were all analytical grade and used without further purification.

$\text{Cd}_{0.3}\text{Zn}_{0.7}\text{S}$  was synthesized via ethylenediamine as an auxiliary pathway via a hydrothermal reaction. 6 mmol  $\text{Cd}(\text{CH}_3\text{COO})_2 \cdot 2\text{H}_2\text{O}$  and 14 mmol  $\text{Zn}(\text{CH}_3\text{COO})_2 \cdot 2\text{H}_2\text{O}$  was added into 50 mL deionized water under constant stirring. 25 mmol thioacetamide and 10 mL ethylenediamine were then added to the above aqueous solution, and the mixture was stirred for 1 h. Then, the above solution was transferred to a 100 mL polyethylene lined stainless steel autoclave and kept at 180 °C for 12 h. After the reaction was completed, the mixture was cooled to room temperature. After centrifugation and

washing three times with deionized water and ethanol, the product was dried in a vacuum oven at 60 °C for 12 h to obtain  $\text{Cd}_{0.3}\text{Zn}_{0.7}\text{S}$ .

A simple ion exchange method was applied to synthesize  $\text{Ag}_3\text{PO}_4$ . In a typical synthesis, 0.255 g  $\text{AgNO}_3$ , 1.14 g  $\text{Na}_3\text{PO}_4$  were dispersed into 30 mL of deionized water and stirred for about 30 min. Then the  $\text{Na}_3\text{PO}_4$  solution was added dropwise to the  $\text{AgNO}_3$  solution step by step and kept stirring for about 30 min. After the reaction was completed, the precipitate in the mixture was cooled to room temperature and collected by centrifugation, and washed three times with water and ethanol, respectively. Finally, the sample was dried in an oven at 60 °C for 12 h to obtain  $\text{Ag}_3\text{PO}_4$ .

$\text{Cd}_{0.3}\text{Zn}_{0.7}\text{S}/\text{Ag}_3\text{PO}_4$  was synthesized by a simple in situ precipitation method. In a typical synthesis, the prepared  $\text{Cd}_{0.3}\text{Zn}_{0.7}\text{S}$  was dispersed in 50 mL of deionized water and then sonicated for 3 hr. Under stirring for 1 h,  $\text{Ag}_3\text{PO}_4$  was added to the above dispersion solution and stirred for 24 h under light-proof conditions. After the final reaction was completed the precipitate in the mixture was cooled to room temperature and collected by centrifugation and rinsed three times with water and ethanol, respectively. After that, the samples were ground for 4 h. Finally, the samples were dried in an oven at 60 °C for 12 h to obtain  $\text{Cd}_{0.3}\text{Zn}_{0.7}\text{S}/\text{Ag}_3\text{PO}_4$ . Different composites were synthesized according to different molar ratios of  $\text{Ag}_3\text{PO}_4$  addition, which were noted as  $\text{Cd}_{0.3}\text{Zn}_{0.7}\text{S}/1\%\text{Ag}_3\text{PO}_4$ ,  $\text{Cd}_{0.3}\text{Zn}_{0.7}\text{S}/6\%\text{Ag}_3\text{PO}_4$ .

<sup>a</sup> Key Laboratory of Functional Inorganic Material Chemistry, Ministry of Education, School of Chemistry and Materials Science, Heilongjiang University, Harbin, 150080, PR China

<sup>b</sup> Shandong Provincial Key Laboratory of Molecular Engineering, School of Chemistry and Chemical Engineering, Qilu University of Technology (Shandong Academy of Sciences), Jinan, Shandong 250353, PR China.

† Footnotes relating to the title and/or authors should appear here.

Electronic Supplementary Information (ESI) available: [details of any supplementary information available should be included here]. See DOI: 10.1039/x0xx00000x

### Characterizations

X-ray diffraction (XRD) patterns were obtained by a Bruker D8 diffractometer using Cu K $\alpha$  radiation. The microstructures were identified by scanning electron microscopy (SEM, FEI Sirion 200) and a transmission electron microscopy (FEI Talos F200S). Nitrogen adsorption-desorption isotherms, specific surface areas, and pore size distributions were collected on an ASAP 2460 aperture analyzer. Optical absorption and diffuse reflectance spectrometry (UV-DRS) were performed using the UV-Vis spectrophotometer (Lambda 950). X-band electron paramagnetic resonance (EPR) spectra were recorded using a BRUKER N500 EPR spectrometer. The photoluminescence (PL) were detected on a fluorescence spectrometer (PerkinElmer FL 6500) with an excitation wavelength of 243 nm. X-ray photoelectron spectroscopy (XPS) was used to understand the elemental chemical composition of different samples by ESCALab 250 systems. Raman spectroscopy is used to analyze lattice vibration of the samples by the HORIBA HR 800 spectrometer.

### Photocatalyst test

The photocatalytic hydrogen production experiments were performed in a photocatalytic hydrogen production system (Labsolar-6A, Beijing Perfect Light Technology Co., Ltd.). A cut-off filter ( $\lambda > 400$  nm) was used to remove the UV light to produce visible light, and a 300 W Xe-lamp was used as the light source. In a typical photocatalytic test, 50 mg of photocatalyst was dispersed in 100 mL of an aqueous solution containing 10 mL of lactic acid and 90 mL of water as the sacrificial reagent, and the solution was stirred continuously during the test. Before visible light irradiation, the opening was sealed with a quartz cap with a silicone rubber gasket, and the test apparatus was evacuated for 30 min to remove O<sub>2</sub> from the reaction system. Finally, the mixture was exposed under radiation and the gas product was analyzed using a gas chromatograph (Techcomp 7900, TCD, Ar carrier) to determine hydrogen production.

### Photoelectrochemical measurements

The samples were tested on a Princeton Versa STAT 2 electrochemical workstation with a standard three-electrode system

(Ag/AgCl electrode reference electrode and Pt counter electrode) and the electrolyte was a 0.2 M Na<sub>2</sub>SO<sub>4</sub> solution. First, 50 mg sample was dispersed into ethanol with ultrasonic treatment for 4 h. Then, the dispersion was uniformly sprayed onto the FTO glass. Finally, the FTO glass was placed in a tube furnace and calcined at 350 °C under a N<sub>2</sub> gas atmosphere with a heating rate of 5 °C/min for 2 h. The electrolyte was degassed by purging the solution with N<sub>2</sub> gas for 30 min before the photoelectrochemical test, which was performed using a 300 W Xe-lamp with a pass filter (AM 1.5) as the light source. It is worth noting that Mott-Schottky curves were tested under visible light irradiation with 0.2M Na<sub>2</sub>SO<sub>4</sub> as the electrolyte. During the test, three different frequencies were used to make the test results more accurate. After obtaining the flat-band potential, the conduction band potential of the photocatalyst can be determined according to the quantitative relationship between the flat-band potential and the conduction band potential via  $E(\text{NHE})=E(\text{Ag}/\text{AgCl})+0.197$ . After the CB position was determined, the electrochemical driving force for hydrogen evolution was then obtained. To determine the carrier densities of the photoelectrons the following equation was applied,

$$N_d = \frac{2}{q\epsilon\epsilon_0} [d(1/c^2)/dv]^{-1} \quad (1)$$

where  $q$ ,  $\epsilon$ ,  $\epsilon_0$ , and  $c$  are the charge of an electron ( $1.60 \times 10^{-19}$  C), the dielectric constant of a semiconductor, the vacuum permittivity ( $8.854 \times 10^{-12}$  F·cm<sup>-1</sup>), and the capacitance of the depletion region, while  $V$  and  $d(1/c^2)/dv$  are the applied voltage and the slope of a Mott-Schottky plot. All the tests were performed at pH=7. Moreover, during the test, a standard three-electrode system was used, with the photocatalyst as the working electrode, Ag/AgCl as the reference electrode, and Pt as the counter electrode. The conversion between the reversible hydrogen electrode (RHE), standard hydrogen electrode (SHE) and normal hydrogen electrode (NHE) is based on the following equations.

$$E(\text{RHE})=E(\text{NHE})+0.0591 \times \text{PH} \quad (2)$$

$$E(\text{RHE})=E(\text{SHE})+0.0591 \times \text{PH}+0.2415 \quad (3)$$

$$E(\text{NHE})=E(\text{Ag}/\text{AgCl})+0.197 \quad (4)$$

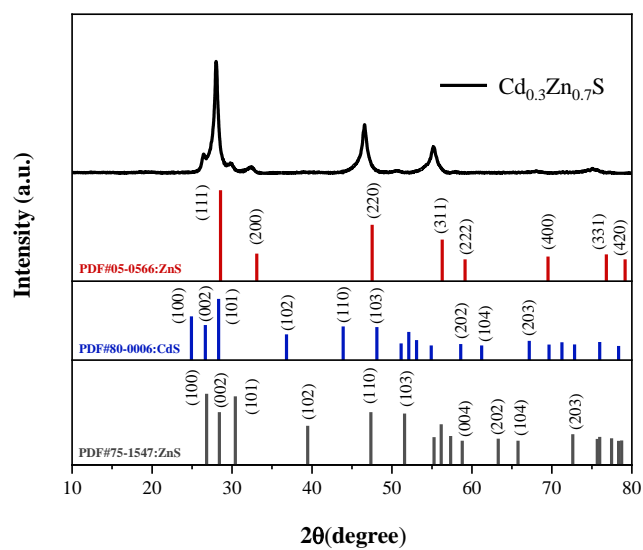

Figure S1 XRD patterns of  $\text{Cd}_{0.3}\text{Zn}_{0.7}\text{S}$ .

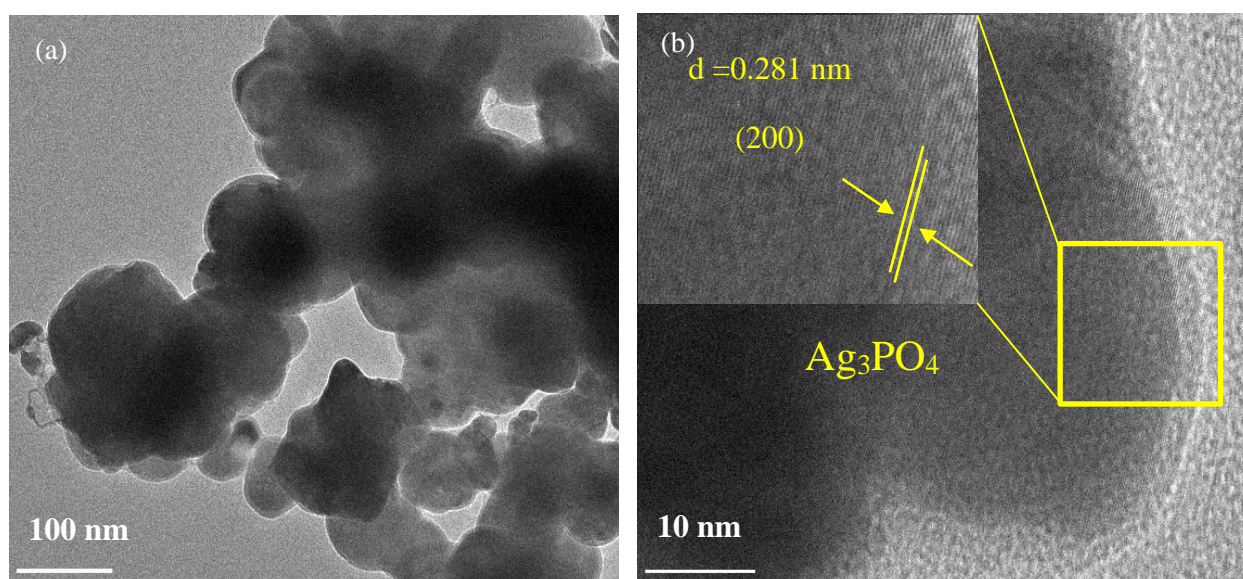

Figure S2 (a) TEM and (b) HRTEM images of  $\text{Ag}_3\text{PO}_4$

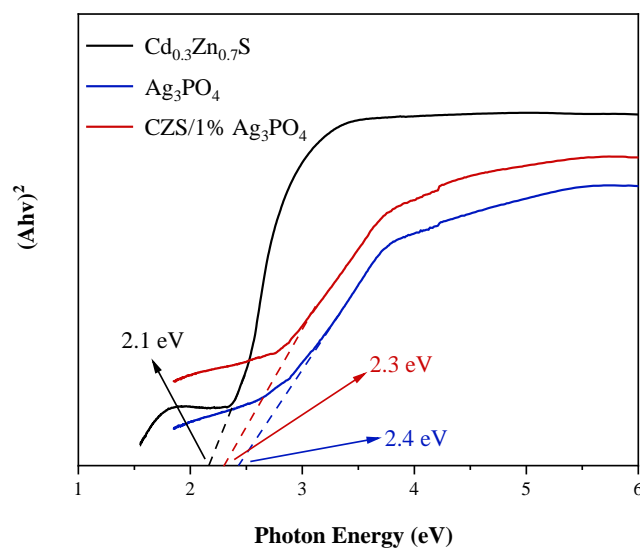

Figure S3 Optical band gaps of  $\text{Cd}_{0.3}\text{Zn}_{0.7}\text{S}$ ,  $\text{Ag}_3\text{PO}_4$ , and  $\text{Cd}_{0.3}\text{Zn}_{0.7}\text{S}/1\% \text{Ag}_3\text{PO}_4$ .

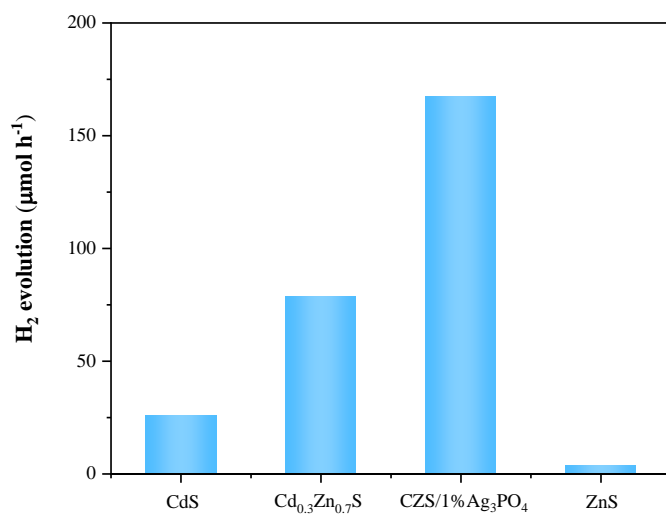

Figure S4 hydrogen production rate of CdS,  $\text{Cd}_{0.3}\text{Zn}_{0.7}\text{S}$ ,  $\text{Cd}_{0.3}\text{Zn}_{0.7}\text{S}/1\% \text{Ag}_3\text{PO}_4$  and ZnS.

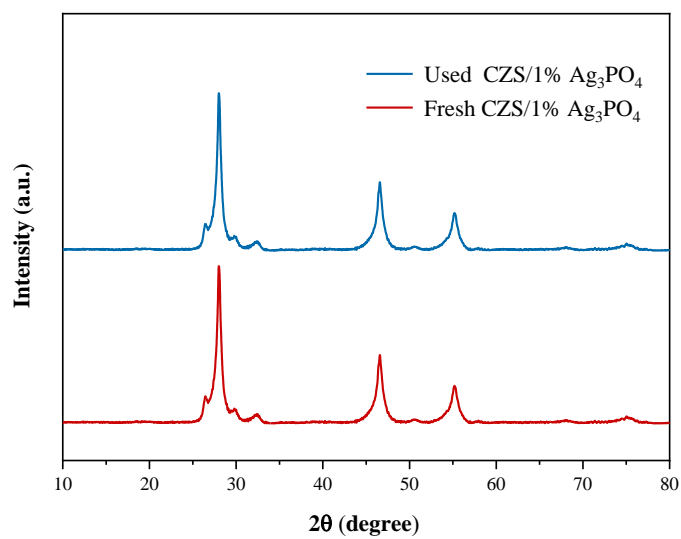

Figure S5 XRD patterns for fresh and used Cd<sub>0.3</sub>Zn<sub>0.7</sub>S/1% Ag<sub>3</sub>PO<sub>4</sub>.

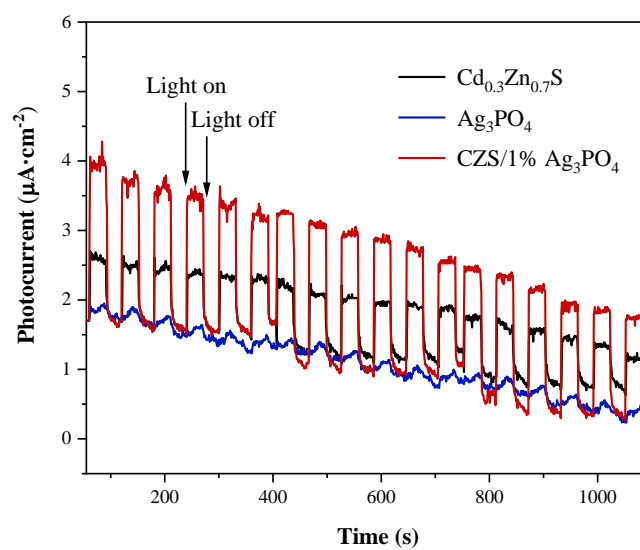

Figure S6 TPC plots of Cd<sub>0.3</sub>Zn<sub>0.7</sub>S, Ag<sub>3</sub>PO<sub>4</sub>, and Cd<sub>0.3</sub>Zn<sub>0.7</sub>S/1%Ag<sub>3</sub>PO<sub>4</sub>.

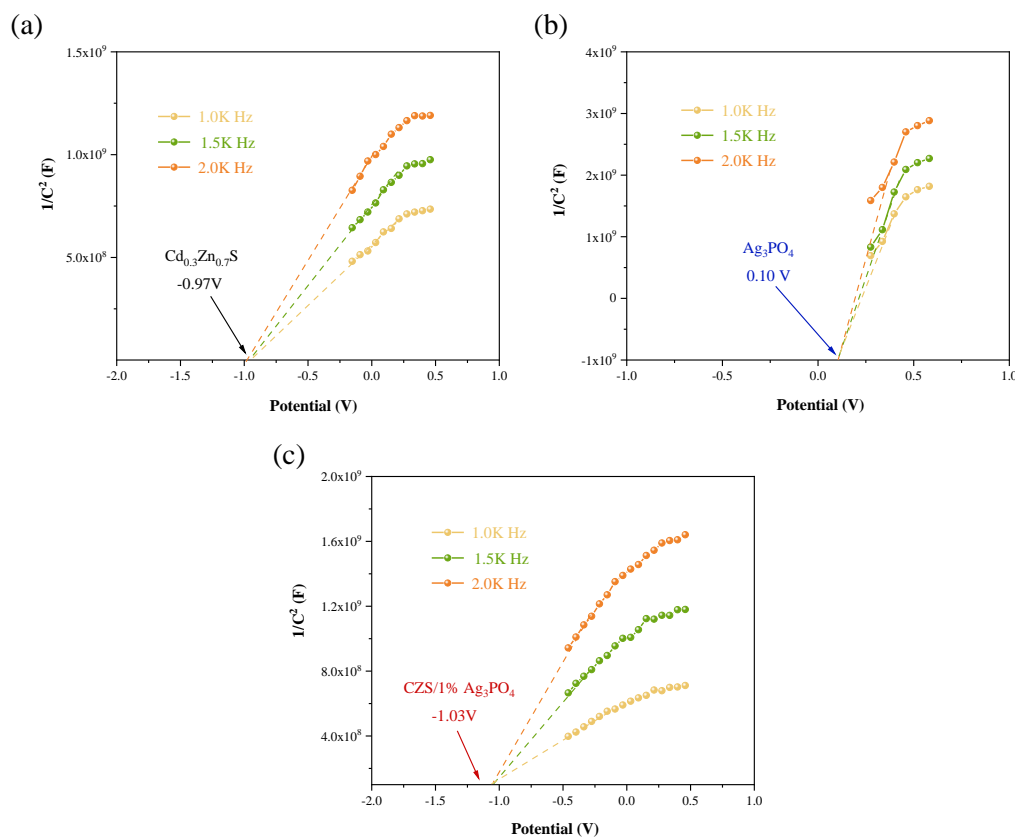

Figure S7 Mott-Schottky plots of (a)  $\text{Cd}_{0.3}\text{Zn}_{0.7}\text{S}$ , (b)  $\text{Ag}_3\text{PO}_4$ , and (c)  $\text{Cd}_{0.3}\text{Zn}_{0.7}\text{S}/1\%\text{Ag}_3\text{PO}_4$ .

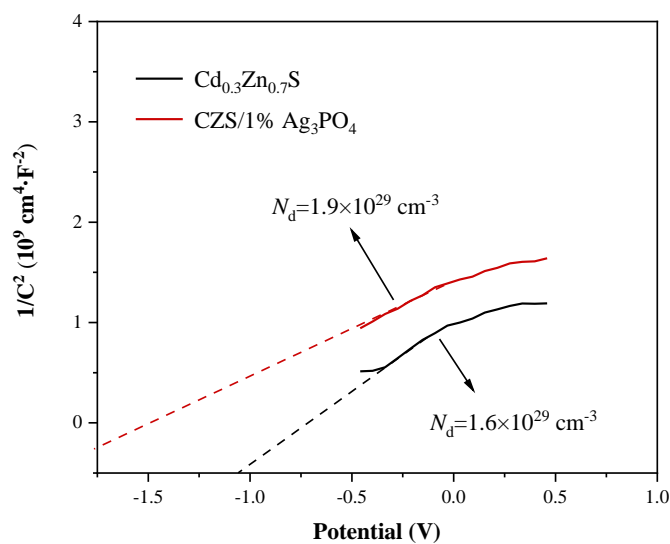

Figure S8 carrier density plots of  $\text{Cd}_{0.3}\text{Zn}_{0.7}\text{S}$ , and  $\text{Cd}_{0.3}\text{Zn}_{0.7}\text{S}/1\%\text{Ag}_3\text{PO}_4$ .

**Table S1** BET specific surface area, pore volume and pore size of different samples. <sup>a</sup>

| Samples                                                                 | S <sub>BET</sub> (m <sup>2</sup> g <sup>-1</sup> ) | Pore volume (cm <sup>3</sup> g <sup>-1</sup> ) | Pore size (nm) |
|-------------------------------------------------------------------------|----------------------------------------------------|------------------------------------------------|----------------|
| Cd <sub>0.3</sub> Zn <sub>0.7</sub> S                                   | 35.032                                             | 0.302                                          | 32.945         |
| Ag <sub>3</sub> PO <sub>4</sub>                                         | 5.322                                              | 0.038                                          | 32.918         |
| Cd <sub>0.3</sub> Zn <sub>0.7</sub> S/1%Ag <sub>3</sub> PO <sub>4</sub> | 30.930                                             | 0.349                                          | 41.201         |

<sup>a</sup>The error bar in all measurement errors within  $\pm 0.002$ .

**Table S2** Experimental band gaps of CdS, ZnS and Cd<sub>1-x</sub>Zn<sub>x</sub>S.

| Samples      | CdS  | Cd <sub>0.3</sub> Zn <sub>0.7</sub> S | ZnS  | Cd <sub>0.5</sub> Zn <sub>0.5</sub> S <sup>1</sup> | Cd <sub>0.5</sub> Zn <sub>0.5</sub> S <sup>2</sup> | Cd <sub>0.6</sub> Zn <sub>0.4</sub> S <sup>3</sup> | CdS <sup>4</sup> |
|--------------|------|---------------------------------------|------|----------------------------------------------------|----------------------------------------------------|----------------------------------------------------|------------------|
| Band Gap(eV) | 2.20 | 2.10                                  | 3.30 | 2.52                                               | 2.22                                               | 2.47                                               | 2.13             |

**Table S3** Comparison of photocatalytic H<sub>2</sub> evolution rate of the metal sulfide photocatalysts with previous reported photocatalysts.

| Photocatalyst                                      | Sacrificial agent                                               | Light source             | H <sub>2</sub> evolution rate (μmol h <sup>-1</sup> g <sup>-1</sup> ) | Ref. |
|----------------------------------------------------|-----------------------------------------------------------------|--------------------------|-----------------------------------------------------------------------|------|
| CdS/graphene                                       | Lactic acid                                                     | 350 W Xe<br>(λ > 420 nm) | 1120                                                                  | 5    |
| 3D NiO-CdS                                         | 0.35 M Na <sub>2</sub> S/0.25 M Na <sub>2</sub> SO <sub>3</sub> | 500 W lamp               | 745                                                                   | 6    |
| CdS nanosheets                                     | 0.25 M Na <sub>2</sub> S/Na <sub>2</sub> SO <sub>3</sub>        | 300 W Xe<br>(λ > 420 nm) | 3334                                                                  | 7    |
| NiS <sub>2</sub>                                   |                                                                 |                          |                                                                       |      |
| Cd <sub>0.5</sub> Zn <sub>0.5</sub> S              | 0.35 M Na <sub>2</sub> S/0.6 M Na <sub>2</sub> SO <sub>3</sub>  | 300 W Xe<br>(λ > 420 nm) | 284.7                                                                 | 8    |
| CZS@Bi <sub>2</sub> Fe <sub>4</sub> O <sub>9</sub> | 0.35 M Na <sub>2</sub> S/0.6 M Na <sub>2</sub> SO <sub>3</sub>  | 300 W Xe<br>(λ > 420 nm) | 811.5                                                                 | 8    |
| CdZnS                                              | Lactic acid                                                     | LDE lamp                 | 449.4                                                                 | 9    |
| rGO/Cd <sub>x</sub> Zn <sub>1-x</sub> S            | 0.35 M Na <sub>2</sub> S/0.25 M Na <sub>2</sub> SO <sub>3</sub> | 150 W Xe arc lamp        | 1060                                                                  | 10   |
| Cd <sub>0.5</sub> Zn <sub>0.5</sub> S              | 0.35 M Na <sub>2</sub> S/0.25 M Na <sub>2</sub> SO <sub>3</sub> | 300 W Xe<br>(λ > 400 nm) | 1023                                                                  | 11   |

| ARTICLE                                                                  |                                                                 |                                 |                                                  |                  | Journal Name |
|--------------------------------------------------------------------------|-----------------------------------------------------------------|---------------------------------|--------------------------------------------------|------------------|--------------|
| In <sub>2</sub> O <sub>3</sub> /Cd <sub>0.5</sub> Zn <sub>0.5</sub> S    | 0.35 M Na <sub>2</sub> S/0.25 M Na <sub>2</sub> SO <sub>3</sub> | 300 W Xe<br>(λ > 420 nm)        | 1110                                             | 12               |              |
| ZnS /g-C <sub>3</sub> N <sub>4</sub>                                     | menthanol                                                       | UV-LDE lamp                     | 194                                              | 13               |              |
| ZnS                                                                      | 0.35 M Na <sub>2</sub> S/0.25 M Na <sub>2</sub> SO <sub>3</sub> | 300 W Xe<br>(λ > 420 nm)        | 83.77                                            | 14               |              |
| W-ZnS                                                                    | 0.35 M Na <sub>2</sub> S/0.25 M Na <sub>2</sub> SO <sub>3</sub> | 300 W Xe<br>(λ > 400 nm)        | 63.68                                            | 15               |              |
| <b>Cd<sub>0.3</sub>Zn<sub>0.7</sub>S/1% Ag<sub>3</sub>PO<sub>4</sub></b> | Lactic acid                                                     | <b>300 W Xe</b><br>(λ > 400 nm) | <b>3345.79</b><br>(167.29 μmol h <sup>-1</sup> ) | <b>This work</b> |              |

## Notes and references

- X. Zhang, Z. Cheng, P. Deng, L. Zhang and Y. Hou, *Int. J. Hydrogen Energy*, 2021, **46**, 15389-15397.
- H. Hua, F. Feng, M. Du, Y. Ma, Y. Pu, J. Zhang and X. a. Li, *Appl. Surf. Sci.*, 2021, **541**, 148428.
- H. B. Huang, Z. B. Fang, K. Yu, J. Lü and R. Cao, *J. Mater. Chem. A*, 2020, **8**, 3882-3891.
- J. Guo, Y. Liang, L. Liu, J. Hu, H. Wang, W. Cui, *J. Colloid Interface Sci.*, 2021, **600**, 138-149.
- Q. Li, B. Guo, J. Yu, J. Ran, B. Zhang, H. Yan and J. R. Gong, *J. Am. Chem. Soc.*, 2011, **133**, 10878-10884.
- Z. Khan, M. Khannam, N. Vinothkumar, M. De and M. Qureshi, *J. Mater. Chem.*, 2012, **22**, 12090-12095.
- S. Ma, X. Xu, J. Xie and X. Li, *Chin. J. Catal.*, 2017, **38**, 1970-1980.
- H. Hua, F. Feng, M. Du, Y. Ma, Y. Pu, J. Zhang and X. a. Li, *Appl. Surf. Sci.*, 2021, **541**, 148428.
- L. Song, S. Zhang, D. Liu, S. Sun and J. Wei, *Int. J. Hydrogen Energy*, 2020, **45**, 8234-8242.
- Q. Li, H. Meng, J. Yu, W. Xiao, Y. Zheng and J. Wang, *Chem. Eur. J.*, 2014, **20**, 1176-1185.
- L. Zhang, F. Zhang, H. Xue, J. Gao, Y. Peng, W. Song and L. Ge, *Chin. J. Catal.*, 2021, **42**, 1677-1688.
- H. Yang, J. Tang, Y. Luo, X. Zhan, Z. Liang, L. Jiang, H. Hou and W. Yang, *Small*, 2021, **17**, e2102307.
- F. Shi, L. Chen, C. Xing, D. Jiang, D. Li and M. Chen, *RSC Adv.*, 2014, **4**, 62223-62229.
- X. Hao, Y. Wang, J. Zhou, Z. Cui, Y. Wang and Z. Zou, *Appl. Catal., B*, 2018, **221**, 302-311.
- B. Xiao, T. Lv, J. Zhao, Q. Rong, H. Zhang, H. Wei, J. He, J. Zhang, Y. Zhang, Y. Peng and Q. Liu, *ACS Catal.*, 2021, **11**, 13255-13265.
